# Supplementary material for: Rapid and portable mid-infrared analysis of wet sediment samples by a novel “filter-press” attenuated total reflectance method
Source: Springer Nature journal article supplement (doi:10.1007/s12665-023-11350-y), 2024-01-01
Supplement: MOESM1 [file 26598566]

1 **Rapid and portable mid-infrared analysis of wet sediment samples by a novel “filter-press” attenuated total reflectance**  
2 **method**

3 Leslie J. Janik<sup>a,b\*</sup>, Stuart L. Simpson<sup>c</sup>, Mark Farrell<sup>d</sup>, Luke M. Mosley<sup>b</sup>

4 <sup>a</sup>CSIRO Land and Water, Kurna Country, Waite Road, Urrbrae, South Australia, Australia

5 <sup>b</sup>School of Biological Sciences, University of Adelaide, Kurna Country, Adelaide, South Australia, Australia.

6 <sup>c</sup>CSIRO Environment, Tharawal Country, Lucas Heights, New South Wales, Australia.

7 <sup>d</sup>CSIRO Agriculture and Food, Kurna Country, Waite Road, Urrbrae, South Australia, Australia.

8 \* Correspondence to Leslie Janik. Email: [les.janik@csiro.au](mailto:les.janik@csiro.au). ORCID: 0000-0003-0259-1097.

9

10

11 **SUPPLEMENTARY INFORMATION**

12 **Site description**

13 The Coorong Lagoon is a long (~100 km), shallow (~1.3 m mean depth) and narrow (~0.5-2 km wide) estuarine-hypersaline lagoon system at the end of  
14 Australia's largest river system, the Murray. It is an inverse estuary system, with salinities, nutrient and OC concentrations increasing with distance away from  
15 the river mouth (Mosley et al. 2020). The Coorong has a semi-arid climate with mean annual rainfall in the local area of 383 mm, net open water (Morton's  
16 Lake) evaporation of approx. 800 mm/year and mean maximum and minimum air temperatures of 20.9 and 11.9°C respectively, although temperature can  
17 increase to >40°C in summer (Mosley et al. 2023). External sediment sources include the River Murray, which has dominant illitic and smectitic clay contents  
18 (Gingele and De Deckker 2005), minor local contributions from the nearby Salt Creek catchment higher in quartz and dolomite (Merry and Fitzpatrick 2005),  
19 and sand blown in from the seaward dune system.

20

21

22 **Fig. S1**

23 *Map of the Coorong Lagoon including location of water and sediment sampling*  
24 *sites. Calibration samples (Set-1) are located at site numbers 1-50. For Set-2,*  
25 *Parnka Point is located at site number 101 (Sediments T1 and T2), Parnka South*  
26 *at 102 (Sediments T3-T6) and Tea Tree at site 103 (Sediments T7-T11)*

27

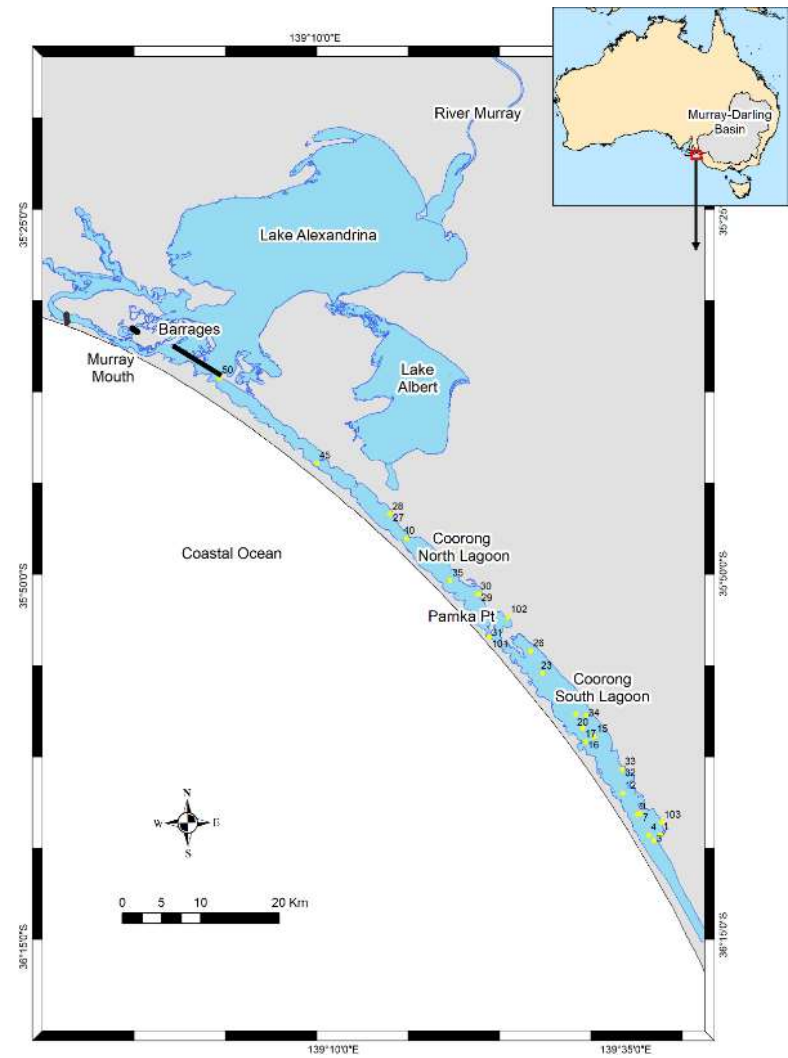

28 **Fig. S2**

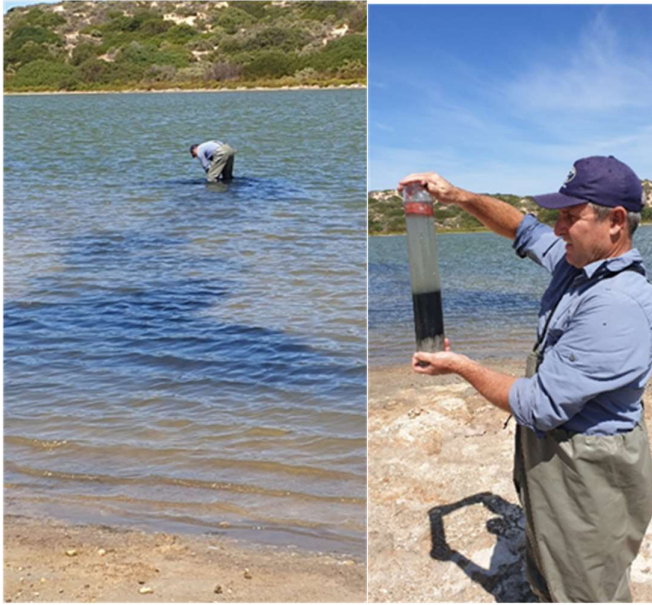

29

30 *Method of collecting core samples with the polycarbonate push tube for analysis*

31

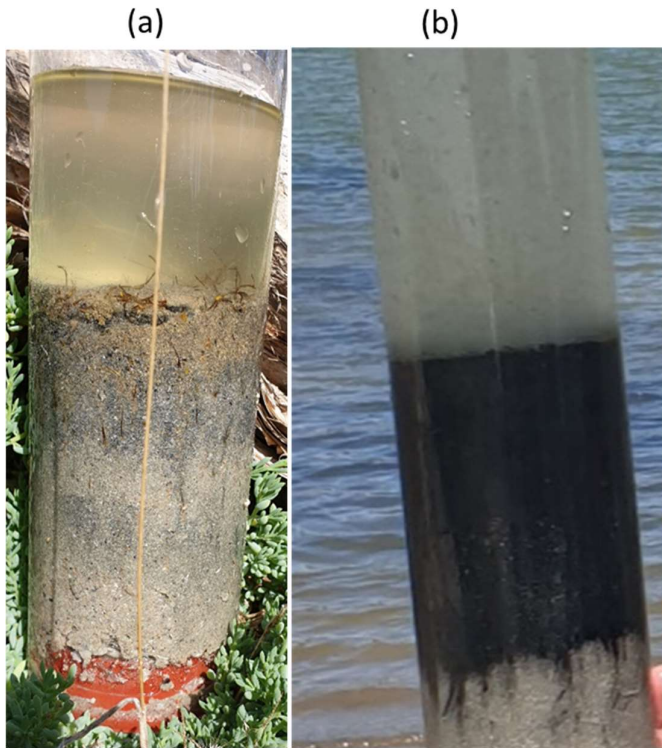

33

34 *Examples of core samples from (a) Tea Tree and (b) Parnka Point taken with the polycarbonate push tube for analysis*

35

36

37 **Fig. S4**

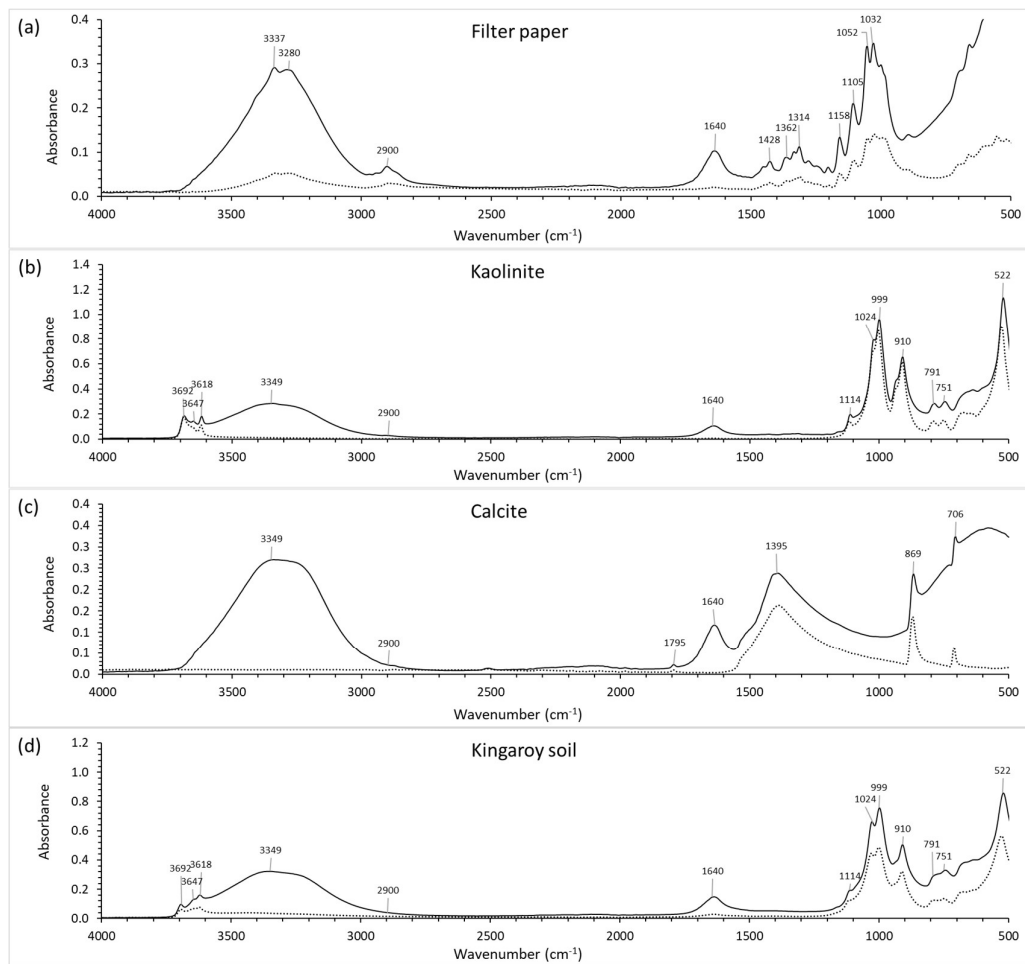

38

39 *ATR spectra of (a) filter paper (Whatman #5), (b) low crystallinity kaolinite (Birdwood, South Australia), (c) calcite (Calcium carbonate, Merck) and (d)*

40 *Kingaroy soil (QLD, Australia), pressed dry (···) and then wet filter-pressed (—) onto the crystal surface.*

41

42 **Fig. S5**

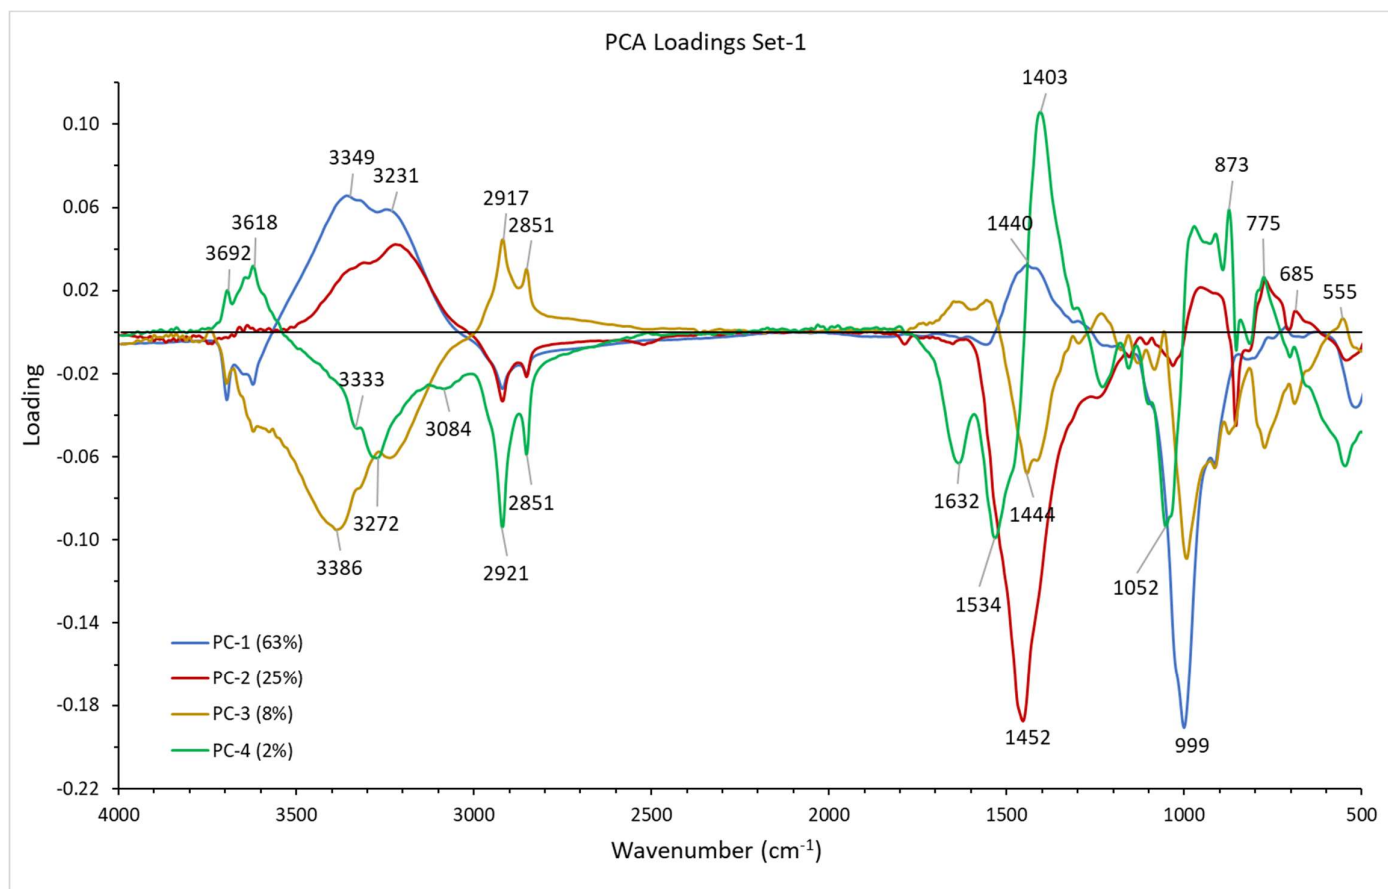

43

44 *PCA loading spectra of the filter-paper pressed Set-1 sediment samples after removal of samples C13, C14 and C17. Frequencies of the major peaks are*  
45 *indicated in the figure.*

46

47 **Fig. S6**

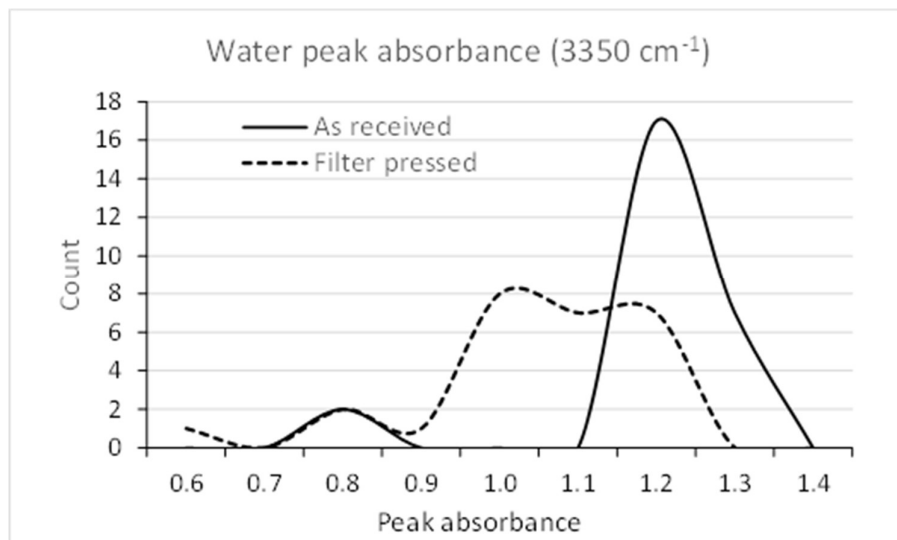

48  
49 *Absorbance distributions of the 3350 cm<sup>-1</sup> water peak for the As-received and Filter pressed calibration spectra*

50 **Table S1** Laboratory data for sediments in the Coorong Set-1

| Sediment | ID | ID and Depth (cm) | Easting (GDA Zone54) | Northing (GDA Zone54) | TEXTURE (ISSS) | WATER (%) | TOC (%) | TIC (%) | CLAY (%) | SILT (%) | SAND (%) | pH  | EC (dS/m) | TP (mg/kg) | TN (%) | AVS (%) | CRS (%) |
|----------|----|-------------------|----------------------|-----------------------|----------------|-----------|---------|---------|----------|----------|----------|-----|-----------|------------|--------|---------|---------|
| C1       | 1  | 01 0-5 cm         | 377352               | 6000352               | Sand           | 28.8      | 0.26    | 8.36    | 7        | 1        | 92       | 9.3 | 12        | 163        | 0.05   | 0       | 0.06    |
| C2       | 3  | 03 0-5 cm         | 376503               | 5999578               | Sand           | 19.3      | 0.3     | 7.1     | 5        | 0        | 95       | 9.2 | 9         | 171        | 0.04   | 0       | 0.05    |
| C3       | 4  | 04 0-5 cm         | 375811               | 6000267               | Clay           | 80.4      | 6.36    | 3.74    | 57       | 1        | 42       | 8.5 | 96        | 547        | 0.78   | 0.02    | 0.21    |
| C4       | 7  | 07 0-5 cm         | 374751               | 6003071               | Clay           | 79.3      | 6.31    | 3.03    | 70       | 9        | 21       | 8.4 | 95        | 504        | 0.75   | 0.05    | 0.26    |
| C5       | 9  | 09 0-5 cm         | 374370               | 6002924               | Clay           | 80.6      | 6.64    | 2.68    | 79       | 2        | 19       | 8.3 | 109       | 688        | 0.78   | 0.04    | 0.23    |
| C6       | 12 | 12 0-5 cm         | 372513               | 6005638               | Sandy Loam     | 36.8      | 0.82    | 5.24    | 11       | 1        | 88       | 9.2 | 21        | 130        | 0.14   | 0       | 0.06    |
| C7       | 15 | 15 0-5 cm         | 368883               | 6012868               | Clay           | 80.1      | 5.55    | 2.28    | 82       | 4        | 15       | 8.4 | 100       | 522        | 0.72   | 0.05    | 0.29    |
| C8       | 16 | 16 0-5 cm         | 367763               | 6012281               | Sandy Clay     | 66.9      | 2.97    | 5.19    | 35       | 1        | 64       | 8.6 | 58        | 422        | 0.38   | 0.04    | 0.18    |
| C9       | 17 | 17 0-5 cm         | 367412               | 6013992               | Clay           | 71.3      | 3.9     | 1.87    | 51       | 3        | 46       | 8.5 | 65        | 371        | 0.45   | 0.07    | 0.26    |



|     |      |              |        |         |                 |      |      |      |    |    |    |     |     |     |      |       |      |
|-----|------|--------------|--------|---------|-----------------|------|------|------|----|----|----|-----|-----|-----|------|-------|------|
| C10 | 20   | 20 0-5 cm    | 366520 | 6015827 | Clay            | 80.2 | 5.94 | 1.29 | 92 | 7  | 1  | 8.4 | 98  | 580 | 0.75 | 0.06  | 0.29 |
| C11 | 23   | 23 0-5 cm    | 362271 | 6020991 | Clay            | 80.8 | 5.16 | 1.36 | 90 | 4  | 6  | 8.4 | 101 | 685 | 0.7  | 0.05  | 0.27 |
| C12 | 26   | 26 0-5 cm    | 360755 | 6023844 | Clay            | 74.3 | 2.58 | 4.65 | 82 | 15 | 3  | 8.5 | 75  | 373 | 0.46 | 0.06  | 0.27 |
| C13 | 27.1 | 27.1 0-2 cm  | 342792 | 6041428 | Sand            | 18.4 | 0.3  | 0.06 | 4  | 1  | 95 | 9   | 8   | 47  | 0.05 | <0.01 | 0.01 |
| C14 | 27.2 | 27.2 2-5 cm  | 342792 | 6041428 | Sand            | 18.6 | 0.18 | 0.19 | 2  | 1  | 97 | 9.1 | 6   | 21  | 0.03 | <0.01 | 0.01 |
| C15 | 27.3 | 27.3 5-10 cm | 342792 | 6041428 | Sand            | 25.2 | 0.13 | 0.06 | 3  | 2  | 95 | 9   | 5   | 23  | 0.03 | 0.01  | 0.01 |
| C16 | 28   | 28 0-5 cm    | 342726 | 6041376 | Sand            | 21.1 | 0.39 | 0.15 | 5  | 0  | 95 | 9   | 5   | 64  | 0.05 | 0.01  | 0.02 |
| C17 | 29   | 29 0-5 cm    | 354117 | 6031137 | Sandy Loam      | 29.9 | 0.82 | 0.83 | 15 | 1  | 84 | 8.9 | 16  | 79  | 0.1  | 0.04  | 0.08 |
| C18 | 30   | 30 0-5 cm    | 353988 | 6031130 | Sandy Clay Loam | 38.6 | 0.96 | 2    | 20 | 0  | 80 | 8.8 | 19  | 89  | 0.09 | 0.01  | 0.14 |
| C19 | 31   | 31 0-5 cm    | 355432 | 6025659 | Sandy Clay      | 58.4 | 2.63 | 2.2  | 39 | 3  | 58 | 8.6 | 41  | 331 | 0.31 | 0.08  | 0.24 |
| C20 | 32   | 32 0-5 cm    | 372471 | 6008708 | Sand            | 26.1 | 0.71 | 0.81 | 7  | 2  | 91 | 8.9 | 14  | 73  | 0.07 | 0.02  | 0.03 |
| C21 | 33   | 33 0-5 cm    | 372471 | 6008709 | Sandy Loam      | 27.7 | 0.75 | 0.71 | 10 | 0  | 90 | 9   | 14  | 84  | 0.08 | 0.02  | 0.04 |
| C22 | 34   | 34 0-5 cm    | 367842 | 6015627 | Sand            | 21.6 | 0.35 | 3.18 | 6  | 0  | 94 | 9.1 | 11  | 58  | 0.06 | 0.01  | 0.04 |
| C23 | 35   | 35 0-5 cm    | 350402 | 6032876 | Clay            | 77.4 | 5.55 | 0.41 | 83 | 13 | 4  | 8.3 | 73  | 528 | 0.68 | 0.08  | 0.64 |
| C24 | 40   | 40 0-5 cm    | 344861 | 6038275 | Sandy Loam      | 42.3 | 1.26 | 0.21 | 16 | 1  | 83 | 8.5 | 17  | 166 | 0.17 | 0.05  | 0.17 |
| C25 | 45   | 45 0-5 cm    | 333434 | 6047916 | Clay            | 64.8 | 1.67 | 1.15 | 50 | 1  | 50 | 8.4 | 21  | 281 | 0.24 | 0.05  | 0.65 |
| C26 | 50   | 50 0-5 cm    | 320955 | 6058852 | Sandy Loam      | 42.3 | 1.09 | 0.42 | 11 | 1  | 89 | 8.6 | 8   | 215 | 0.13 | 0.04  | 0.14 |

ISSS = International Soil Science Society. Particle size: Clay <2 µm Silt = 2-20 µm; Sand >20 µm. . EC on sediment following 1:5 water addition.  
 TOC – total organic carbon, TIC – total inorganic carbon. AVS – Acid Volatile Sulfide, CRS – Chromium Reducible Sulfur

51  
52  
53  
54

55 **Table S2** Laboratory data for sediments at Parnka and Tea Tree (Set-2).

| Sediment | ID    | Site and Depth      | Easting<br>(GDA<br>Zone54) | Northing<br>(GDA<br>Zone54) | TEXTURE<br>(ISSS) | WATER<br>(%) | TOC<br>(%) | TIC<br>(%) | CLAY<br>(%) | SILT<br>(%) | SAND<br>(%) | pH   | EC<br>(dS/m) | TP<br>(mg/kg) | TN<br>(%) | AVS<br>(%) | CRS<br>(%) |
|----------|-------|---------------------|----------------------------|-----------------------------|-------------------|--------------|------------|------------|-------------|-------------|-------------|------|--------------|---------------|-----------|------------|------------|
| T1       | 101-1 | Parnka Point 0-2cm  |                            |                             |                   | Wet          | 4.91       |            |             |             |             | 8.93 | 42.8         | 665           | 0.69      | 0.068      | 0.45       |
| T2       | 101-2 | Parnka Point 8-10cm |                            |                             |                   | Wet          | 2.2        |            |             |             |             | 8.97 | 30.8         | 337           | 0.29      | 0.04       | 0.2        |
| T3       | 102-1 | Parnka Sth A 0-2cm  |                            |                             |                   | Wet          | 1.14       |            |             |             |             | 9.28 | 17.5         | 180           | 0.14      | 0.006      | 0.13       |
| T4       | 102-2 | Parnka Sth A 2-4cm  |                            |                             |                   | Wet          | 0.70       |            |             |             |             | 9.42 | 13.5         | 133           | 0.08      | 0.001      | 0.13       |
| T5       | 102-3 | Parnka Sth B 0-2cm  |                            |                             |                   | Wet          | 2.35       |            |             |             |             | 9.18 | 43.4         | 288           | 0.27      | 0.011      | 0.18       |
| T6       | 102-4 | Parnka Sth B 2-4cm  |                            |                             |                   | Wet          | 0.75       |            |             |             |             | 9.47 | 13           | 183           | 0.09      | 0.002      | 0.16       |
| T7       | 103-1 | Tea Tree 0-2cm      |                            |                             |                   | Wet          | 0.83       |            |             |             |             | 9.56 | 12.8         | 94            | 0.11      | 0.001      | 0.03       |
| T8       | 103-2 | Tea Tree 2-4cm      |                            |                             |                   | Wet          | 0.73       |            |             |             |             | 9.55 | 13.3         | 98            | 0.08      | 0.002      | 0.03       |
| T9       | 103-3 | Tea Tree 4-6cm      |                            |                             |                   | Wet          | 0.63       |            |             |             |             | 9.56 | 13.2         | 52            | 0.07      | 0.001      | 0.04       |
| T10      | 103-4 | Tea Tree 6-8cm      |                            |                             |                   | Wet          | 0.59       |            |             |             |             | 9.52 | 12.3         | 59            | 0.06      | 0.001      | 0.04       |
| T11      | 103-5 | Tea Tree 8-10       |                            |                             |                   | Wet          | 0.89       |            |             |             |             | 9.13 | 12.9         | 118           | 0.11      | 0.003      | 0.129      |

ISSS = International Soil Science Society. Particle size: Clay <2 µm Silt = 2-20 µm; Sand >20 µm. . EC on sediment following 1:5 water addition.  
 TOC – total organic carbon, TIC – total inorganic carbon. AVS – Acid Volatile Sulfide, CRS – Chromium Reducible Sulfur.

56  
57  
58  
59
